# Supplementary material for: Plasmodium vivax Tryptophan Rich Antigen PvTRAg36.6 Interacts with PvETRAMP and PvTRAg56.6 Interacts with PvMSP7 during Erythrocytic Stages of the Parasite
Source: PubMed Central journal article supplement (PMC4783080; doi:10.1371/journal.pone.0151065), 2016-03-08
Supplement: pone.0151065.s001.pdf [file pone.0151065.s001.pdf]

**Table S1. Growth phenotype of yeast AH109 cells co-transformed with different PvTRAg constructs**

| S.No. | Transformation constructs |                   | Selection on dropout media            |                             |                                 |
|-------|---------------------------|-------------------|---------------------------------------|-----------------------------|---------------------------------|
|       | BAIT                      | TARGET            | SD-Leu <sup>-</sup> /Trp <sup>-</sup> | SD-Leu/Trp/His <sup>-</sup> | SD-Leu/Trp/His/Ade <sup>-</sup> |
| 1     | -                         | pGAD vector       | -                                     | -                           | -                               |
| 2     | pGBK vector               | -                 | -                                     | -                           | -                               |
| 3     | pGBK-AL4                  | pGAD-AL1          | +                                     | +                           | +                               |
| 4     | pGBK-PvTRAg36.6           | pGAD vector       | +                                     | -                           | -                               |
| 5     | pGBK-PvTRAg36.6           | pGAD-<br>PvETRAMP | +                                     | +                           | +                               |
| 6     | pGBK-PvTRAg52.6           | pGAD vector       | +                                     | -                           | -                               |
| 7     | pGBK-PvTRAg52.6           | pGAD-<br>PvMSP7   | +                                     | +                           | +                               |

SD-Leu<sup>-</sup>/Trp, leucine and tryptophan double dropout; SD-Leu/Trp/His, , leucine, tryptophan and histidine triple dropout; SD-Leu/Trp/His/Ade<sup>-</sup>, leucine, tryptophan, histidine and adenine quadruple dropout.
